# Supplementary material for: Substitute or Supplement? The Role of Multimodal Digital Biomarkers in Mobile Cognitive Impairment Assessment Tools
Source: Research Square preprint supplement (doi:10.21203/rs.3.rs-6590583/v1), 2025-05-07
Supplement: Supplementary file 1 [file 54ba993edf14c63e2b64e141.pdf]

# **Substitute or Supplement? The Role of Multimodal Digital Biomarkers in Mobile Cognitive Impairment Assessment Tools**

Whani Kim<sup>1†</sup>, Jin Sung Kim<sup>2†</sup>, So Yoon Park<sup>1</sup>, Hyun Jeong Ko<sup>1</sup>, Byung Hun Yun<sup>1,3</sup>, Yu Young Kim<sup>1,3</sup>, Dong Han Kim<sup>1</sup>, Ui Jun Kwon<sup>1</sup>, Sang Kwon Lim<sup>1</sup>, Bo Ri Kim<sup>4</sup>, Jee Hang Lee<sup>2,5\*</sup>, Geon Ha Kim<sup>6,\*</sup>, Jin Woo Kim<sup>1,3</sup>

## **\*Co-Correspondence:**

Geon Ha Kim (geonha@ewha.ac.kr)

Jee Hang Lee ([jeehang@smu.ac.kr](mailto:jeehang@smu.ac.kr))

## **List of contents**

- I. Evaluation Metrics
- II. SHAP value

## **Supplementary Figures**

Figure S1. Result

Figure S2. Confusion Matrices (2x2x2) for Various DBM Combinations

## **Supplementary Table**

Table S1. Applications for Early Screening of Cognitive Impairment (CI): Types of Digital Biomarkers and Sensor Technologies

Table S2. Tasks in Digital Assessment of Cognitive Impairment

Table S3. Comparison of performance metrics (AUC, Accuracy, Sensitivity, Specificity) across ten candidate ML classifiers.

Table S4. Results of Ablation Study – Changes in Classification Performance When Recursively Eliminating Specific DBMs

Table S5. Results of Ablation Study – Changes in Classification Performance When Recursively Eliminating Specific DBMs

Table S6. Three-Way ANOVA Results on AUC scores Variation by Task Combination

Table S7. Optimized Feature Sets Selected for Each Task Combination

## I. Evaluation Metrics

Two independent performance metrics, (i) Receiver Operating Characteristic Area Under Curve, or ROC-AUC (Equation 5), and (ii) Accuracy (Equation 6), were used in the study. The ROC curve is a graph that graphically shows the relationship between the ratio of the True Positive Rate, TPR (Equation 2), and the ratio of the False Positive Rate, FPR (Equation 3) to the incorrectly identified case for HC. The ROC-AUC value is a value for the area below the ROC Curve, and the closer to 1, the better the model. We also used TPR, which is well known for its sensitivity, as well as True Negative Rate, TNR (Equation 4) which is well known for its specificity, as a performance metric. Additionally, to prevent data leakage, we filled the missing values in both the training and test data based on the mean values from the training data. We also considered applying SMOTE and Adasyn techniques, which are popular oversampling techniques as oversampling techniques, as the data is balanced (Chawla et al., 2022; He et al., 2008). However, it was not well applied in our data and was not adopted (Supplementary Table 1). This was likely due to the high dimensionality of our data, which made these techniques less effective (Jacqueline et al., 2021; Wensheng et al., 2022; Tharinda et al., 2023).

$$TPR = \frac{TP}{TP + FN} \quad (2)$$

$$FPR = \frac{FP}{FP + TN} \quad (3)$$

$$TNR = \frac{TN}{FP + TN} \quad (4)$$

$$ROC-AUC = \int_{x=0}^1 TPR(FPR^{-1}(x))dx \quad (5)$$

$$Accuracy = \frac{TP + TN}{TP + TN + FP + FN} \quad (6)$$

where  $TP$ ,  $FN$ ,  $TN$ , and  $FP$  stand for true positives, false negatives, true negatives, and false positives, respectively.

## II. SHAP value

The SHAP value for a feature  $j$  in a specific prediction is formulated as shown in Equation 1:

$$\phi_j = \sum_{S \subseteq F \setminus \{j\}} \frac{|S|!(|F|-|S|-1)!}{|F|!} [f_S(X_{S \cup \{j\}}) - f_S(X_S)] \quad (1)$$

where  $\phi_j$  is the SHAP value for feature  $j$ ,  $S$  is a subset of all the features  $F$  excluding feature  $j$ ,  $|S|$  and  $|F|$  are the cardinality subsets of sets  $S$  and  $F$ ,  $f_S$  is the prediction function constrained to features in set  $S$ , and  $X_{S \cup \{j\}}$  and  $X_S$  are feature sets with and without including feature  $j$ , respectively. The SHAP value represents the average marginal contribution of feature  $j$  across all possible feature combinations in the prediction model, which directly indicates the relative importance of this feature.

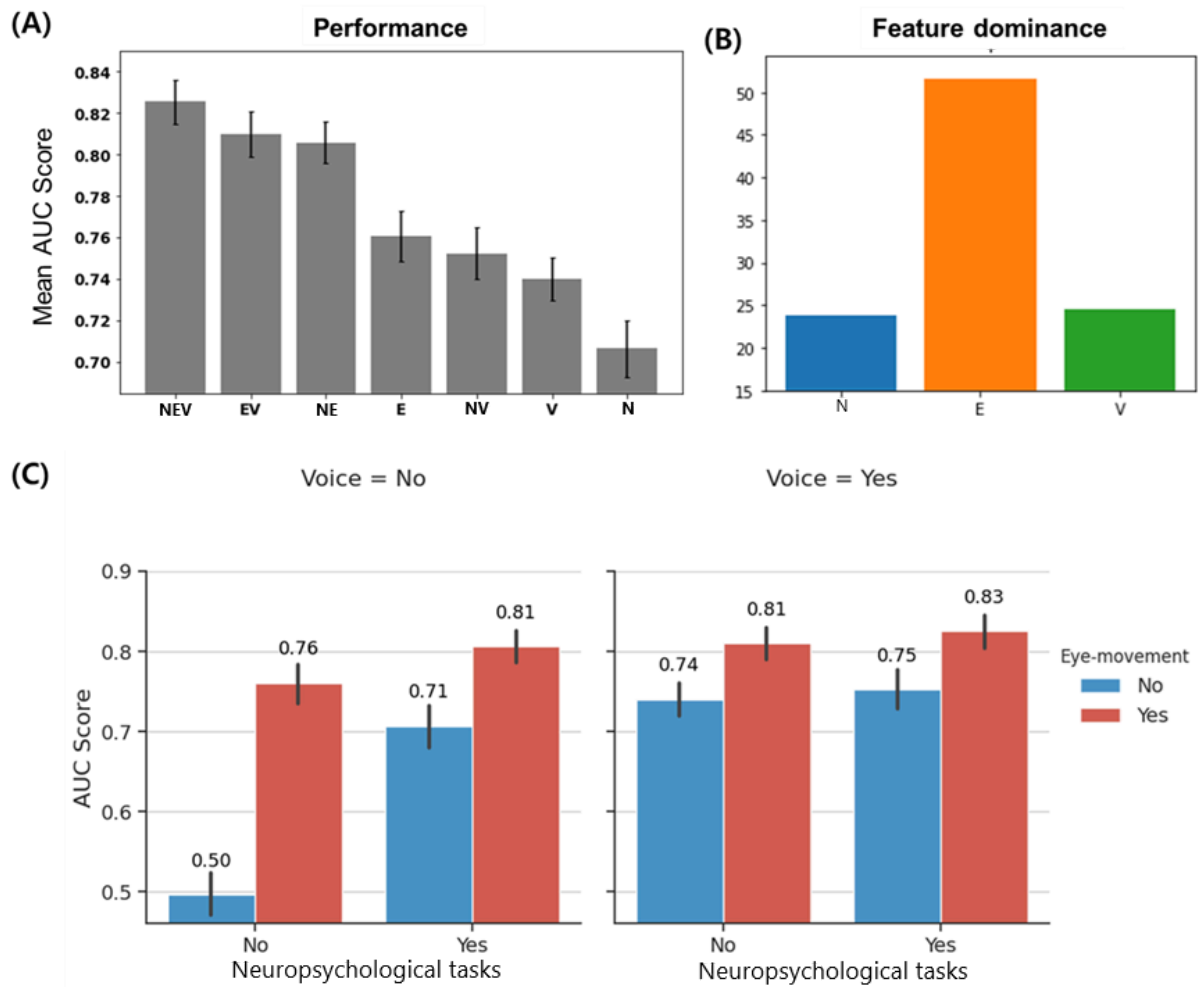

**Figure S1.** Result. **(A)** Mean AUC score for models that were trained with multiple combinations of DBMs. The X-axis shows the machine learning model with various DBM combinations, while the Y-axis indicates the Mean AUC score of each model. **(B)** Feature dominance of individual DBMs. The X-axis displays the individual DBMs, and the Y-axis shows the feature dominance that ranges from 0 to 100. **(C)** Results from the factorial design experiment among three DBMs. The X-axis indicates the presence of a neuropsychological task, and the Y-axis shows the mean AUC score. N refers to a neuropsychological task, E refers to eye movement, and V refers to voice assessment.

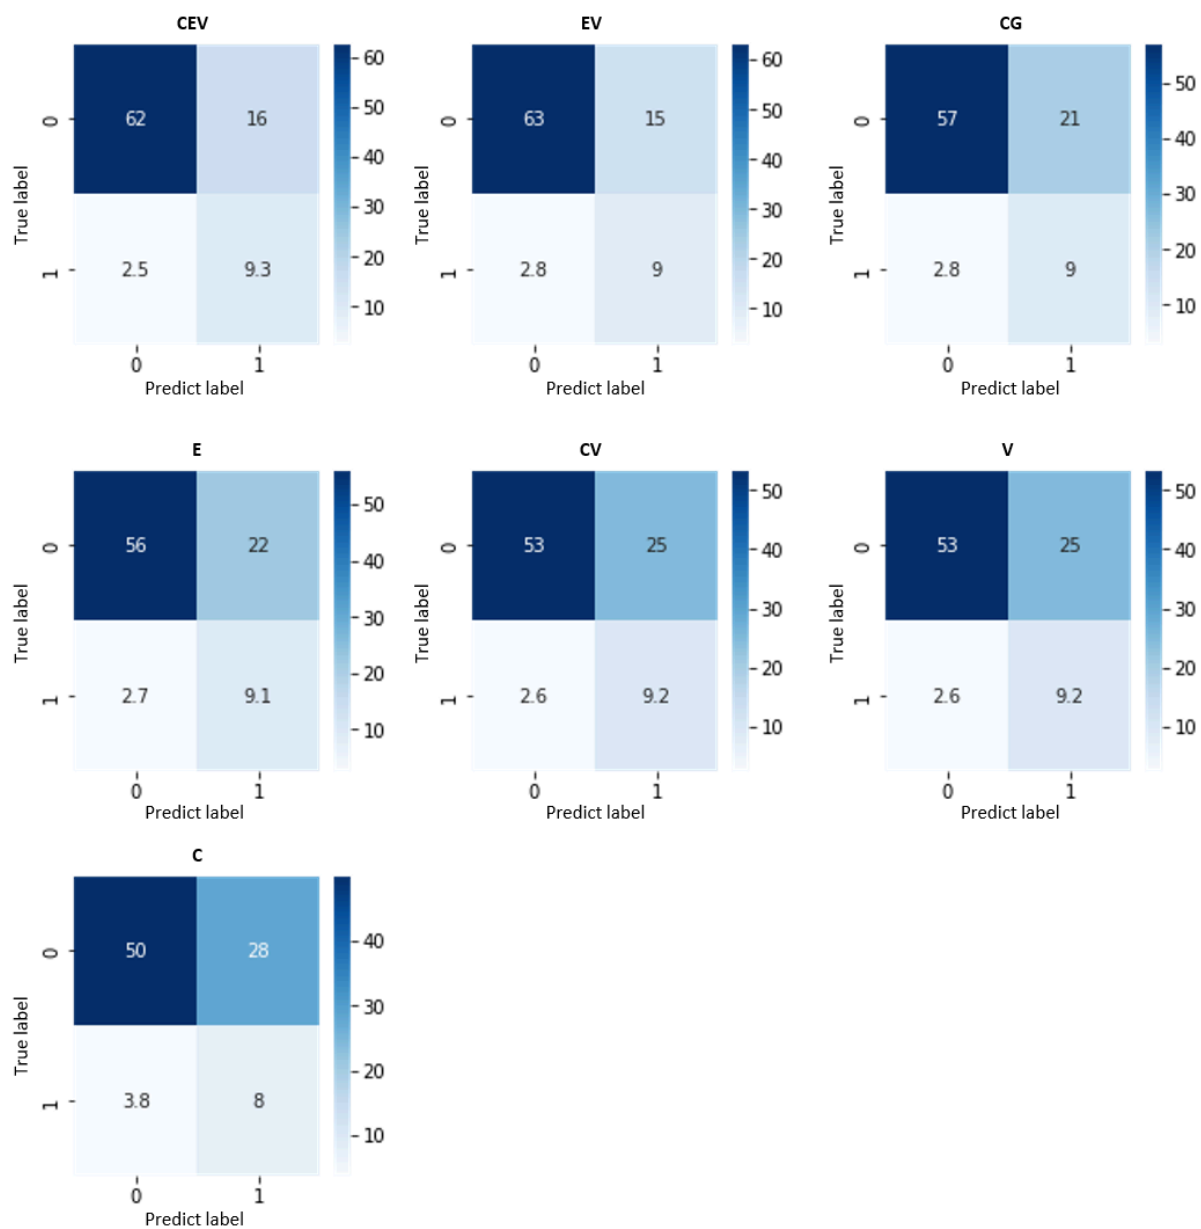

**Figure S2.** Confusion Matrices (2x2x2) for Various DBM Combinations

**Table S1.** Applications for Early Screening of Cognitive Impairment (CI): Types of Digital Biomarkers and Sensor Technologies

| Digital Tool                              | Sensor      | DBMs                  | Reference               |
|-------------------------------------------|-------------|-----------------------|-------------------------|
| Digital neuro signature (DNS)             | Camera      | Eye-movements         | Meier et al., 2021      |
|                                           | Touchscreen | Motor(Speed/Accuracy) |                         |
|                                           | Accel/gyro  | Gait                  | Meier et al., 2020      |
|                                           | Device use  | Augmented Reality(AR) |                         |
| Linkt Health                              | Microphone  | Speech/Voice          | Staffaroni et al., 2020 |
|                                           | Accel/gyro  | Gait                  |                         |
| Rey auditory verbal learning test (RAVLT) | Microphone  | Speech/Voice          | Banks et al., 2024      |
|                                           | Touchscreen | Motor(Speed/Accuracy) |                         |
| Cogstate brief battery (CBB)              | Touchscreen | Motor(Speed/Accuracy) | White et al., 2023      |
| TalkBank CHAT                             | Microphone  | Speech/Voice          | Fraser et al., 2016     |
| Wearable device                           | Microphone  | Speech/Voice          | Cay et al., 2024        |

|                          |                    |                |                  |
|--------------------------|--------------------|----------------|------------------|
| <b>Virtual<br/>kiosk</b> | Camera             | Eye-movements  | Kim et al., 2023 |
|                          | Hand<br>controller | Hand-movements |                  |



**Table S2.** Tasks in *Digital Assessment of Cognitive Impairment*

|                       |                                                                                                                                 |
|-----------------------|---------------------------------------------------------------------------------------------------------------------------------|
| <b>Cognitive Task</b> | Stroop test ( <b>Executive</b> function; Scarpina et al., 2017)                                                                 |
|                       | Symbol association ( <b>Associative recall</b> ; Troyer et al., 2008)                                                           |
|                       | Self-ordered pointing task ( <b>Visual working memory</b> ; Geva et al., 2016)                                                  |
|                       | Arithmetic ( <b>Working memory</b> ; Kasai et al., 2020)                                                                        |
| <b>Voice</b>          | Sentence memorize and speak ( <b>Logical memory</b> ; Wechsler Memory Scale; Sullivan et al., 2018)                             |
|                       | Picture Description ( <b>Language</b> ; Rentoumi et al., 2014; Ahmed et al., 2013; Nicholas et al., 1985; Tomoeda et al., 1996) |
| <b>Eye tracking</b>   | Smooth pursuit ( <b>basic oculomotor</b> )                                                                                      |
|                       | Saccade ( <b>Attention and inhibitory control</b> ; Crawford et al., 2005)                                                      |
|                       | Anti-Saccade ( <b>Inhibitory dysfunction, working memory</b> )                                                                  |

**Table S3.** Comparison of performance metrics (AUC, Accuracy, Sensitivity, Specificity) across ten candidate ML classifiers.

|                    | AUC         | Accuracy    | Sensitivity | Specificity |
|--------------------|-------------|-------------|-------------|-------------|
| CatBoost           | <b>0.65</b> | <b>0.67</b> | 0.67        | 0.67        |
| LightGBM           | 0.61        | 0.61        | 0.70        | 0.60        |
| XGBoost            | 0.59        | 0.64        | 0.65        | 0.64        |
| SVM_RBF            | 0.59        | 0.63        | 0.64        | 0.62        |
| RandomForest       | 0.59        | 0.65        | 0.61        | 0.65        |
| GradientBoosting   | 0.58        | 0.57        | <b>0.71</b> | 0.55        |
| NaiveBayes         | 0.56        | <b>0.67</b> | 0.55        | 0.69        |
| Bagging            | 0.55        | <b>0.67</b> | 0.48        | <b>0.70</b> |
| LogisticRegression | 0.52        | 0.65        | 0.53        | 0.67        |
| SVM_Linear         | 0.48        | <b>0.67</b> | 0.48        | 0.69        |

We compared the performance of the ten candidate machine-learning algorithms that were described in the Method section using repeated stratified K-Fold cross-validation. As we explained in Methods section 2.4, the input consisted of all 725 features, and the output was the prediction on MCI. Table S3 shows the average AUC of each algorithm. *CatBoost* achieved the highest mean AUC across 30 simulation runs, which outperformed all other models (see Supplement Table 3 for more details). Based on this result, we selected *CatBoost* as the classifier for the final layer (which is denoted as "classifier" in Figure 2B).

**Table S4:** Results of Ablation Study – Changes in Classification Performance When Recursively Eliminating Specific DBMs

We fixed the total number of features at 28, and recursively eliminated the set of features in each DBM. The baseline for performance comparison was the model trained with the NEV combination (Neuropsychological tasks, Eye movements, Voice). For the elimination process, we removed seven features when eliminating the Voice DBM, seven features when eliminating the Neuropsychological tasks, and 14 features when eliminating the Eye movements DBM.

| Task       | Number of Features       |              |       |       | Performance |              |             |                   |             |                      |             |                      |
|------------|--------------------------|--------------|-------|-------|-------------|--------------|-------------|-------------------|-------------|----------------------|-------------|----------------------|
|            | Neuropsychological tasks | Eye-movement | Voice | Total | AUC         | $\Delta$ AUC | Accuracy    | $\Delta$ Accuracy | Sensitivity | $\Delta$ Sensitivity | Specificity | $\Delta$ Specificity |
| NEV (Base) | 7                        | 14           | 7     | 28    | 0.83        | 0%           | 0.81        | 0%                | 0.87        | 0%                   | 0.72        | 0%                   |
| EV         | -                        | 14           | 7     | 21    | 0.81        | -2%          | 0.82        | +1%               | 0.71        | -16%                 | 0.85        | +13%                 |
| NE         | 7                        | 14           | -     | 21    | 0.77        | -6%          | 0.79        | -2%               | 0.68        | -19%                 | 0.81        | +9%                  |
| NV         | 7                        | -            | 7     | 14    | 0.73        | -10%         | 0.78        | -3%               | 0.69        | -18%                 | 0.79        | +7%                  |
| V          | -                        | -            | 7     | 7     | 0.73        | -10%         | 0.74        | -7%               | 0.78        | -9%                  | 0.73        | +1%                  |
| E          | -                        | 14           | -     | 14    | 0.71        | -12%         | 0.7         | -11%              | 0.75        | -12%                 | 0.7         | -2%                  |
| N          | 7                        | -            | -     | 7     | <b>0.63</b> | <b>-20%</b>  | <b>0.67</b> | <b>-14%</b>       | <b>0.65</b> | <b>-22%</b>          | <b>0.68</b> | <b>-4%</b>           |

**Table S5:** Results of Ablation Study – Changes in Classification Performance When Recursively Eliminating Specific DBMs

We in this case performed Recursive Feature Elimination with Cross-Validation (RFECV) when building machine learning (ML) models using various combinations of DBMs. We trained each ML model with a specific combination of DBMs where we conducted an optimal feature selection process. For example, to train the EV model, we first excluded all features of Neuropsychological tasks (N) while including all features of Eye movements (E) and Voice (V). We then performed optimal feature selection for this model with the E and V combination. This approach resulted in different numbers of selected features for each combination of DBMs.

| Task       | Number of Features |    |    |       | Performance |              |             |                   |             |                      |             |                      |
|------------|--------------------|----|----|-------|-------------|--------------|-------------|-------------------|-------------|----------------------|-------------|----------------------|
|            | N                  | E  | V  | Total | AUC         | $\Delta$ AUC | Accuracy    | $\Delta$ Accuracy | Sensitivity | $\Delta$ Sensitivity | Specificity | $\Delta$ Specificity |
| NEV (Base) | 7                  | 14 | 7  | 28    | 0.83        | 0%           | 0.81        | 0%                | 0.87        | 0%                   | 0.72        | 0%                   |
| EV         | -                  | 15 | 8  | 23    | 0.81        | -2%          | 0.83        | +2%               | 0.8         | -7%                  | 0.75        | +3%                  |
| NE         | 6                  | 18 | -  | 24    | 0.81        | -2%          | 0.77        | -4%               | 0.86        | -1%                  | 0.68        | -4%                  |
| E          | -                  | 30 | -  | 30    | 0.76        | -7%          | 0.83        | +2%               | 0.75        | -12%                 | 0.76        | +4%                  |
| NV         | 12                 | -  | 35 | 47    | 0.75        | -8%          | 0.8         | -1%               | 0.74        | -13%                 | 0.73        | +1%                  |
| V          | -                  | -  | 40 | 40    | 0.74        | -9%          | 0.82        | +1%               | <b>0.73</b> | <b>-14%</b>          | 0.75        | +3%                  |
| N          | 13                 | -  | -  | 13    | <b>0.71</b> | <b>-12%</b>  | <b>0.75</b> | <b>-6%</b>        | 0.78        | -9%                  | <b>0.66</b> | <b>-6%</b>           |

**Table S6.** *Three-Way ANOVA Results on AUC scores Variation by Task Combination*

| Source    | sum_sq | df  | F      | PR(>F)  |
|-----------|--------|-----|--------|---------|
| N         | 0.3019 | 1   | 72.31  | 2.E-15  |
| E         | 0.9648 | 1   | 231.09 | 1.E-36  |
| V         | 0.4829 | 1   | 115.67 | 4.E-22  |
| N * E     | 0.0988 | 1   | 23.66  | 2.E-0.6 |
| N * V     | 0.1953 | 1   | 46.78  | 7.E-11  |
| E * V     | 0.1835 | 1   | 43.95  | 2.E-10  |
| N * E * V | 0.107  | 1   | 25.62  | 8.E-0.7 |
| Residual  |        | 232 |        |         |

**Table S7.** *Optimized Feature Sets Selected for Each Task Combination*

|    | NEV                | EV                 | NE                       | NV                 | V                  | E                         | N                  |
|----|--------------------|--------------------|--------------------------|--------------------|--------------------|---------------------------|--------------------|
| 1  | Reaction_time_A4   | PD1.Pause:total    | Reaction_time_A4         | Reaction_time_A4   | PD1.Pause:rate     | SP1.Duration1             | Reaction_time_A4   |
| 2  | Reaction_time_A5   | PD1.Pause:rate     | Reaction_time_A5         | Reaction_time_A5   | PD1.CIU:rate       | SP1.InitAccel:min         | Reaction_time_A5   |
| 3  | Reaction_time_A8   | PD1.CIU:rate       | Reaction_time_cal2       | Reaction_time_A8   | PD1.Keyword:rate   | SP2.InitAccel1            | Reaction_time_A8   |
| 4  | Reaction_time_cal2 | PD1.Keyword:rate   | Reaction_time_cal4       | Correct_count.2    | PD2.Pause:rate     | SP2.InitAccel:min         | Reaction_time_cal2 |
| 5  | Reaction_time_cal4 | PD2.Pause:rate     | Correct_count.3          | Reaction_time_cal2 | PD3.Pause:rate     | SP3.Gain1                 | Reaction_time_cal4 |
| 6  | Total_time.7       | PD3.Pause:std      | Total_time.7             | Reaction_time_cal4 | WMS1.Phonation:min | SP3.Velocity1             | Correct_count.3    |
| 7  | PD1.Pause:total    | PD3.Pause:rate     | SP1.Duration1            | Total_time.7       | WMS3.CIU:rate      | Saccade1.Velocity:mean    | Total_time.7       |
| 8  | PD1.Pause:rate     | WMS1.Pause:rate    | SP1.InitAccel:min        | PD1.Pause:total    | -                  | Saccade1.Velocity:median  | -                  |
| 9  | PD1.Keyword:count  | WMS1.CIU:rate      | SP3.Velocity1            | PD1.Pause:rate     | -                  | Saccade1.Velocity:std     | -                  |
| 10 | PD1.Keyword:rate   | WMS2.CIU:rate      | SP3.InitAccel2           | PD1.Keyword:rate   | -                  | Saccade4.Velocity:min     | -                  |
| 11 | PD2.Pause:rate     | SP1.InitAccel:min  | Saccade1.Velocity:mean   | PD2.Pause:rate     | -                  | Saccade5.Velocity2        | -                  |
| 12 | PD3.Pause:std      | SP2.InitAccel1     | Saccade1.Velocity:median | PD3.Pause:rate     | -                  | Saccade5.Velocity:std     | -                  |
| 13 | PD3.Pause:rate     | SP3.Velocity1      | Saccade1.Velocity:std    | PDX.Phonation:std  | -                  | Saccade5.Velocity:max     | -                  |
| 14 | WMS1.Phonation:min | Saccade1.Velocity1 | Saccade1.Velocity:min    | WMS1.Phonation:min | -                  | AntiSaccade5.Velocity:max | -                  |

|    |                                      |                                      |                                       |   |   |   |   |
|----|--------------------------------------|--------------------------------------|---------------------------------------|---|---|---|---|
| 15 | SP1.D<br>uration<br>1                | Saccad<br>e1.Velo<br>city:me<br>an   | Saccad<br>e4.Velo<br>city:min         | - | - | - | - |
| 16 | SP1.Ini<br>tAccel:<br>min            | Saccad<br>e1.Velo<br>city:me<br>dian | Saccad<br>e5.Velo<br>city2            | - | - | - | - |
| 17 | SP3.G<br>ain1                        | Saccad<br>e1.Velo<br>city:std        | Saccad<br>e5.Velo<br>city:std         | - | - | - | - |
| 18 | SP3.Ve<br>locity1                    | Saccad<br>e4.Velo<br>city:min        | Saccad<br>e5.Velo<br>city:ma<br>x     | - | - | - | - |
| 19 | Saccad<br>e1.Velo<br>city1           | Saccad<br>e5.Velo<br>city2           | AntiSa<br>ccade1<br>.Durati<br>on1    | - | - | - | - |
| 20 | Saccad<br>e1.Velo<br>city:me<br>an   | Saccad<br>e5.Velo<br>city:std        | AntiSa<br>ccade2<br>.Velocit<br>y:std | - | - | - | - |
| 21 | Saccad<br>e1.Velo<br>city:me<br>dian | AntiSa<br>ccade1<br>.Durati<br>on1   | AntiSa<br>ccade5<br>.Velocit<br>y:max | - | - | - | - |
| 22 | Saccad<br>e1.Velo<br>city:std        | -                                    | -                                     | - | - | - | - |
| 23 | Saccad<br>e1.Velo<br>city:min        | -                                    | -                                     | - | - | - | - |
| 24 | Saccad<br>e4.Velo<br>city:min        | -                                    | -                                     | - | - | - | - |
| 25 | Saccad<br>e5.Velo<br>city2           | -                                    | -                                     | - | - | - | - |
| 26 | Saccad<br>e5.Velo<br>city:std        | -                                    | -                                     | - | - | - | - |
| 27 | Saccad<br>e5.Velo<br>city:ma<br>x    | -                                    | -                                     | - | - | - | - |
| 28 | AntiSa<br>ccade1<br>.Durati<br>on1   | -                                    | -                                     | - | - | - | - |
